# Supplementary material
Source: PubMed Central journal article supplement (PMC3875633)
Supplement: NIHMS514905-supplement-1_si_001.pdf [file NIHMS514905-supplement-1_si_001.pdf]

# **Chronic Exposure to Carbon Nanotubes Induces Invasion of Human Mesothelial Cells through Matrix Metalloproteinase-2**

*Warangkana Lohcharoenkal,<sup>§</sup> Liying Wang,<sup>†</sup> Todd A. Stueckle,<sup>†</sup> Cerasela-Zoica Dinu,<sup>‡</sup>  
Vincent Castranova,<sup>†</sup> Yuxin Liu,<sup>¶</sup> and Yon Rojanasakul<sup>§\*</sup>*

<sup>§</sup>Department of Pharmaceutical Sciences and Mary Babb Randolph Cancer Center, <sup>‡</sup>Department of Chemical Engineering, and <sup>¶</sup>Department of Computer Science and Electrical Engineering, West Virginia University, Morgantown, WV; <sup>†</sup>Pathology and Physiology Research Branch, National Institute for Occupational Safety and Health, Morgantown, WV

## **AUTHOR INFORMATION**

### **Corresponding Author**

\*Correspondence should be addressed to Prof. Yon Rojanasakul, West Virginia University, Department of Pharmaceutical Sciences and Mary Babb Randolph Cancer Center. Phone: 304-293-1476 Email: yrojan@hsc.wvu.edu

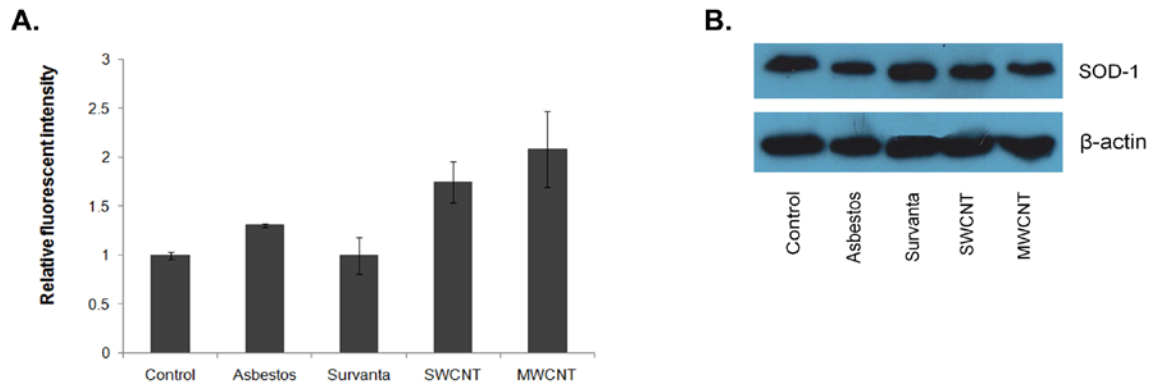

**Supporting Figure S1:** Persistent oxidative stress induction and depletion of ROS protective mechanism in mesothelial MeT5A cells after long-term exposure to SWCNT, MWCNT and asbestos. (A) Passage control (Control), vehicle control (Survanta) and chronic SWCNT, MWCNT or asbestos-exposed cells were seeded in 96 well plates. After overnight incubation, the cells were stained with 5  $\mu$ M of 2,7-dichlorofluorescein diacetate (DCF-DA) in Hank's balanced salt solution (HBSS) for 1 hour. Cellular fluorescence intensity was then measured at the excitation/emission wavelengths of 485/535 nm and expressed as relative fluorescence over control. (B) Superoxide dismutase-1 (SOD-1) expression in passage control, vehicle control, and chronic SWCNT, MWCNT or asbestos-exposed cells determined by Western blotting.

A.

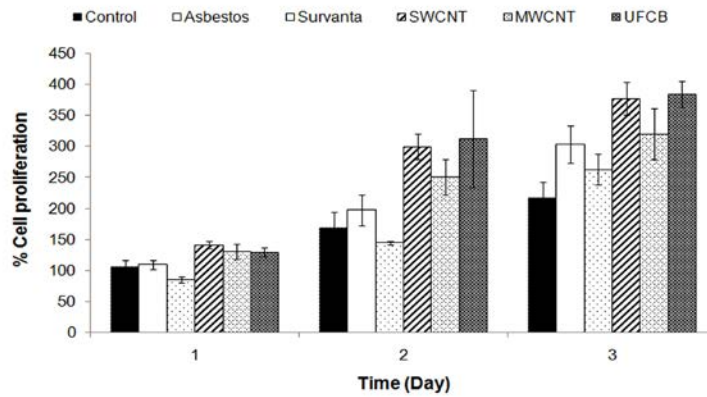

B.

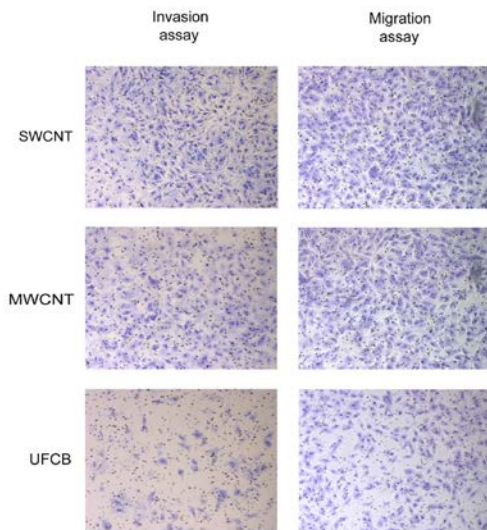

C.

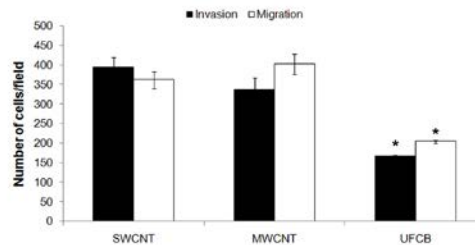

**Supporting Figure S2:** Similar proliferative but not invasive and migratory properties of ultrafine carbon black (UFCB)- and CNT-exposed cells. (A) Cell proliferation as determined by Cyquant<sup>®</sup> cell proliferation assays for 3 continuous days of passage control, vehicle control (Survanta) and chronic SWCNT, MWCNT, asbestos or UFCB-exposed cells. (B) Cell invasion and migration of chronic SWCNT, MWCNT or UFCB-exposed cells determined by Transwell<sup>®</sup> cell invasion and migration assays described under “Materials and Methods”. (C) The invading and migrating cells were quantified and depicted as bar charts. \* = significant difference from CNT-exposed cells with  $P < 0.05$ .
